## Correction

# Correction: Cell-Permeable Parkin Proteins Suppress Parkinson Disease-Associated Phenotypes in Cultured Cells and Animals

**The PLOS ONE Staff**

There is an error in affiliation 4 for author Daewoong Jo. Affiliation 4 should be: Department of Surgery, Vanderbilt University School of Medicine, Nashville, Tennessee, United States of America.

**Reference**

1. Duong T, Kim J, Ruley HE, Jo D, (2014) Cell-Permeable Parkin Proteins Suppress Parkinson Disease-Associated Phenotypes in Cultured Cells and Animals. PLoS ONE 9(7): e102517. doi:10.1371/journal.pone.0102517

---

**Citation:** The PLOS ONE Staff (2014) Correction: Cell-Permeable Parkin Proteins Suppress Parkinson Disease-Associated Phenotypes in Cultured Cells and Animals. PLoS ONE 9(12):e116242. doi:10.1371/journal.pone.0116242

**Published:** December 17, 2014

**Copyright:** © 2014 The PLOS ONE Staff. This is an open-access article distributed under the terms of the Creative Commons Attribution License, which permits unrestricted use, distribution, and reproduction in any medium, provided the original author and source are credited.
